# Supplementary material for: Pachytene piRNAs control discrete meiotic events during spermatogenesis and restrict gene expression in space and time
Source: PubMed Central journal article supplement — Sci Adv. 2024 Oct 2;10(40):eadp0466. doi: 10.1126/sciadv.adp0466 (PMC11446278; doi:10.1126/sciadv.adp0466), 2024-10-02
Supplement: sciadv.adp0466_sm.pdf [file sciadv.adp0466_sm.pdf]

Supplementary Materials for  
**Pachytene piRNAs control discrete meiotic events during spermatogenesis  
and restrict gene expression in space and time**

Jacob Ortega *et al.*

Corresponding author: Swathi Arur, sarur@mdanderson.org

*Sci. Adv.* **10**, eadp0466 (2024)  
DOI: 10.1126/sciadv.adp0466

**The PDF file includes:**

Figs. S1 to S9  
Tables S5 and S6  
Legends for tables S1 to S4, and S7  
Legends for data S1 to S4

**Other Supplementary Material for this manuscript includes the following:**

Tables S1 to S4, and S7  
Data S1 to S4

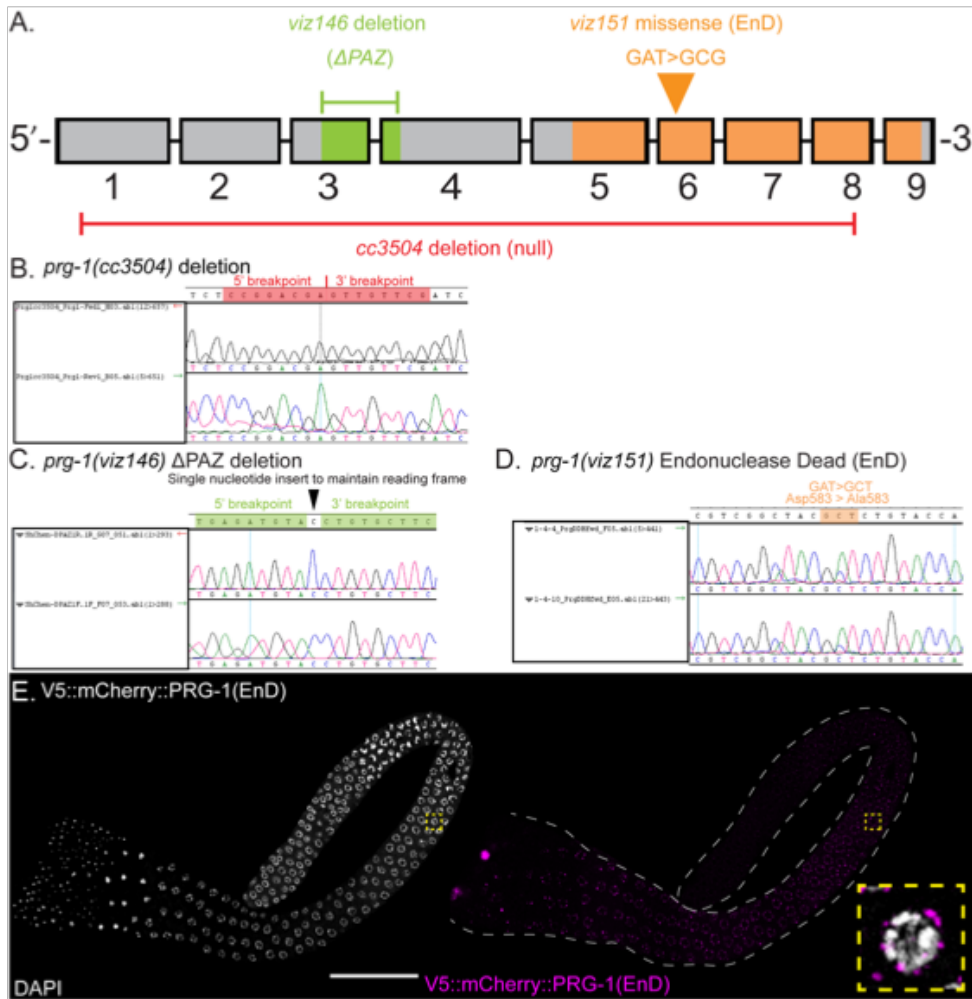

**Supp. Fig. 1: Sequencing data for *prg-1* domain mutants.** (A) Schematic of *prg-1* gene exon structure with protein-domain coding regions highlighted (PAZ-domain, green) (PIWI-domain, orange). Null and domain-specific mutations are noted (Null in red,  $\Delta$ PAZ in green, EnD in orange). (B) Sequencing trace noting the 5' and 3' breakpoints for the *prg-1(cc3504)* deletion. (C) Sequencing trace noting the 5' and 3' breakpoints for the *prg-1(\Delta*PAZ) PAZ-domain deletion. Black arrowhead highlights single nucleotide insertion to maintain reading frame. (D) Sequencing trace for endonuclease-dead allele noting single amino acid substitution at Asp583. (E) Representative image from DAPI-stained (white) dissected male germline expressing V5::mCherry::PRG-1(EnD) (magenta). Inset (dashed line box, yellow) highlights a single pachytene germ cell nuclei. Scale bar: 50  $\mu$ m.

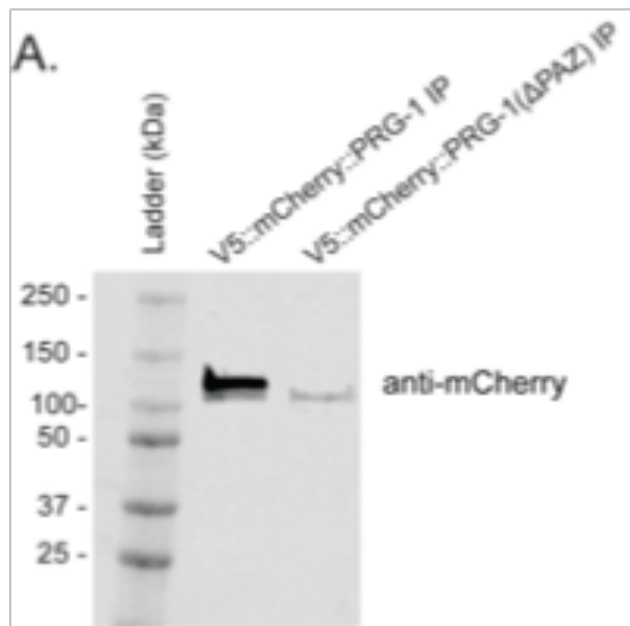

**Supp. Fig. 2: Western blot for IP of V5::mCherry PRG-1 strains for RNA IP.** (A) Western blot for IP of V5::mCherry-tagged PRG-1 strains after IP using V5-Trap beads and 1 mg of worm lysate. Because the total amount of PRG-1 protein in  $\Delta$ PAZ deletion mutant is 60% reduced relative to Wild Type, to sequence small interacting RNAs from equal amount of WT and  $\Delta$ PAZ PRG-1, we performed IP from seven fold as much worm lysate as WT and used 5mg of total protein for each, to perform the IP sequencing.

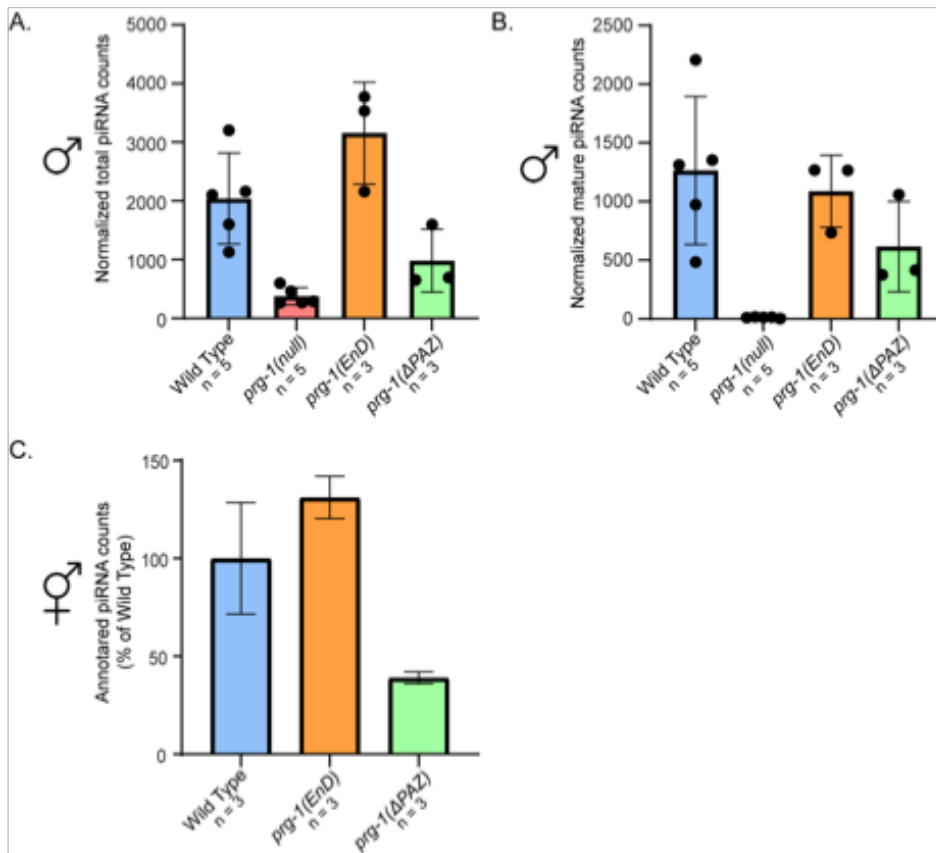

**Supp. Fig. 3: Graphs for piRNA read mapping data. (A)** Graph of total read counts mapping to annotated piRNAs after normalization to total genome mapped reads. **(B)** Graph of mature (21 nt) piRNA counts mapping to annotated piRNAs after normalization to total genome mapped reads. **(C)** Graph of total piRNA read counts mapping to annotated piRNAs after normalization, expressed as percentage relative to wild type.

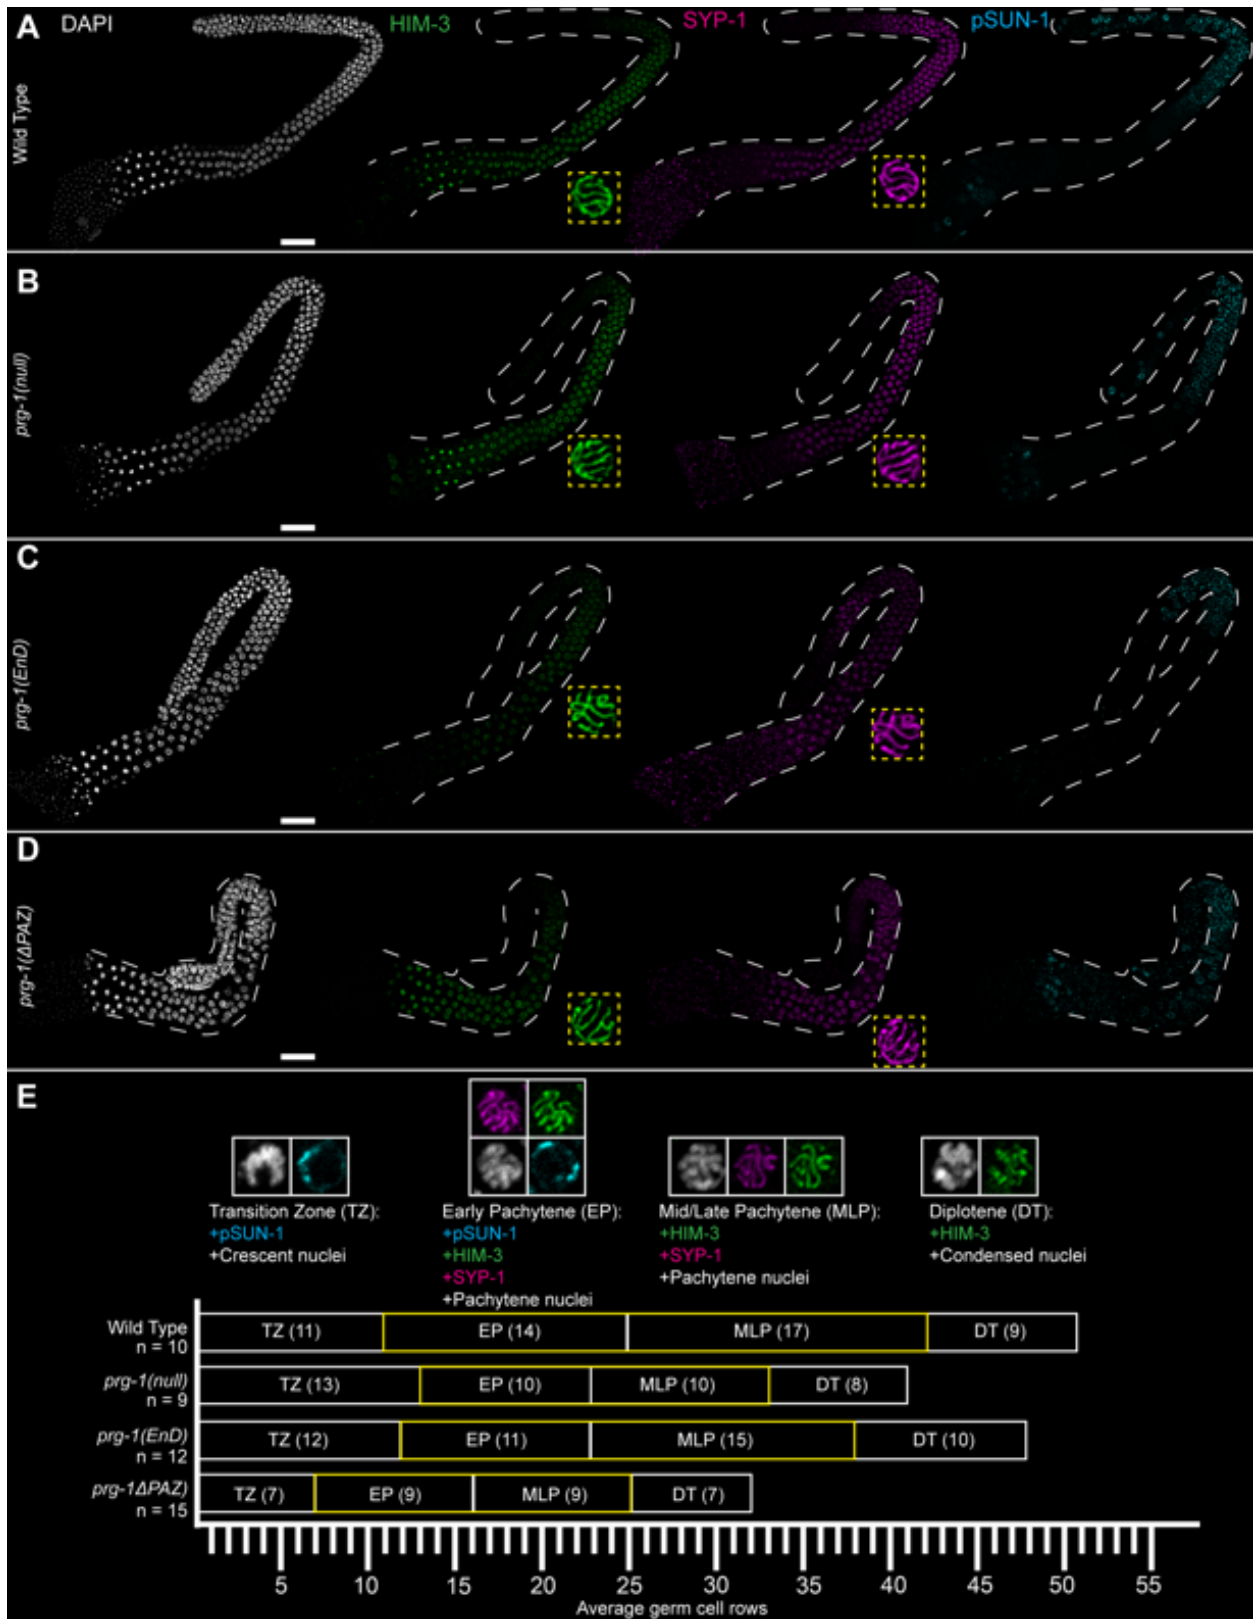

**Supp. Fig. 4: Meiotic markers and quantification of meiotic progression defects in *prg-1* mutant germlines.** (A-D) Representative images of dissected adult male germlines analyzed. Germlines were stained with DAPI (white), anti-HIM-3 (green), anti-SYP-1 (magenta), and pSun-1 (cyan). Insets (dashed-boxes, yellow) indicate single pachytene germ cell nuclei. (E) Graphical representation of the average proportion of total germ cell rows that are either transition zone stage, early pachytene stage, mid/late pachytene stage, or diplotene stage across germlines analyzed. Numbers graphed are averages across germlines analyzed. Scale bar: 50  $\mu$ m. Each experiment was performed at least in triplicate and each time at least 25-30 germlines were analyzed.

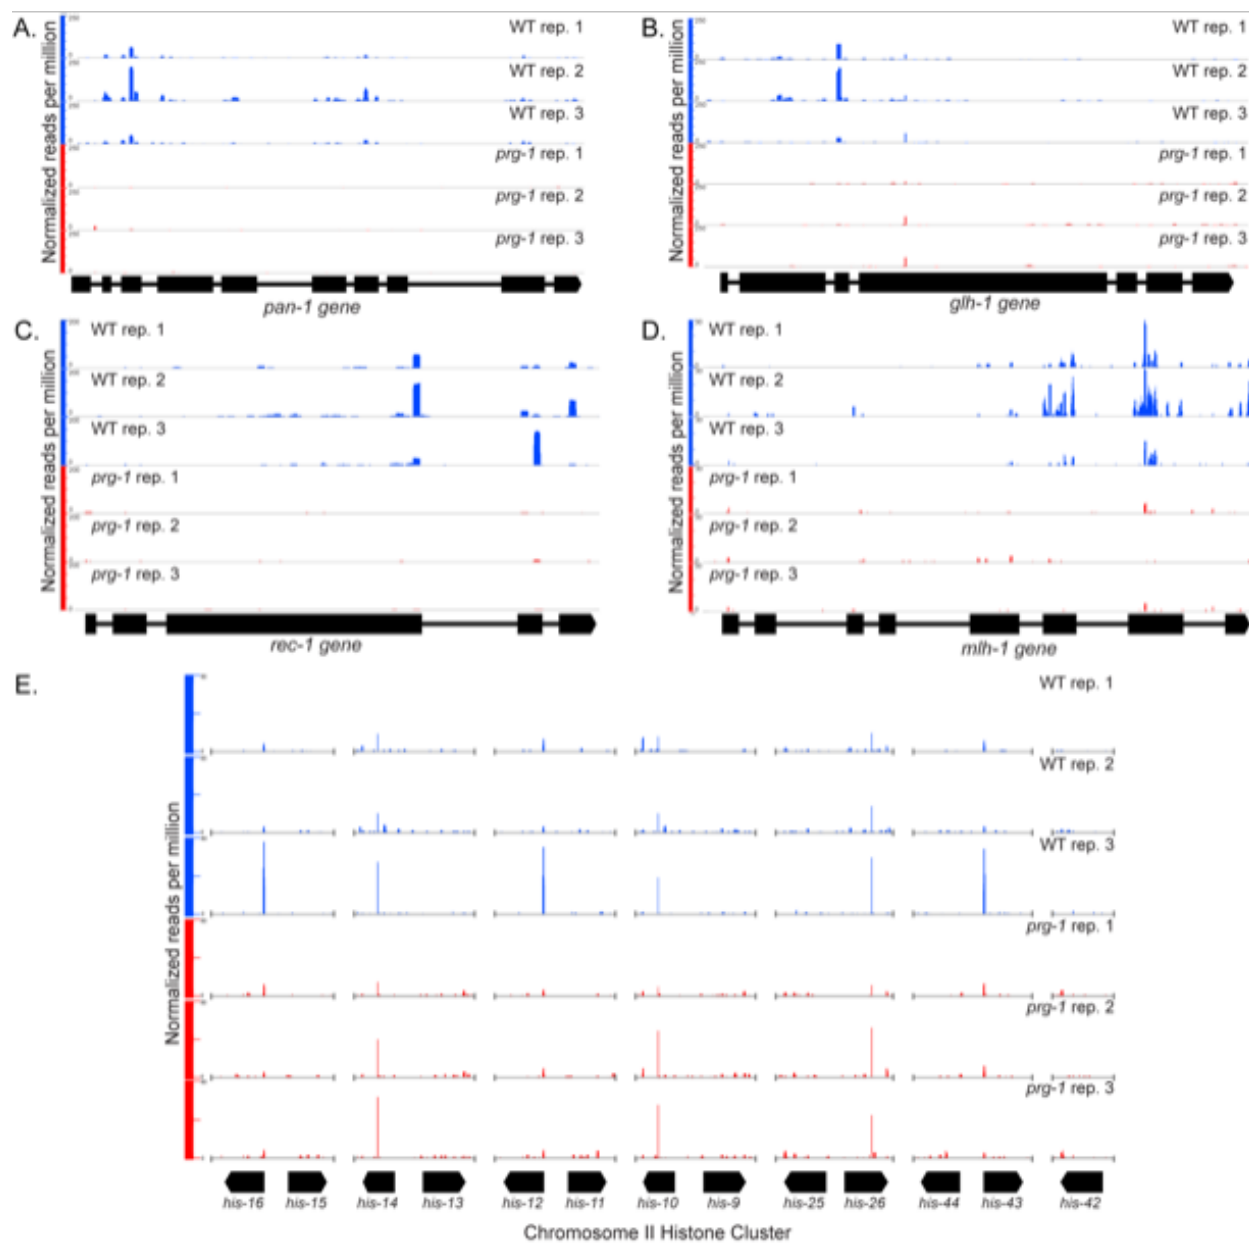

**Supp. Fig. 5: Additional graphs of individual genes for 22G siRNA analysis (A-D)** Read histograms displaying mapped 22G small RNA reads for select genes where 22G siRNAs were changed significantly reduced in *prg-1*(null). Replicates for wild type samples are labeled in blue and replicates for *prg-1*(null) samples are labeled in red. **(E)** Read histogram of mapped 22G small RNA reads for the histone cluster on *C. elegans* chromosome II, which displayed increased 22G siRNA reads in previous studies of *prg-1* mutant hermaphrodites. None of the thirteen genes displayed significant changes in mapped reads.

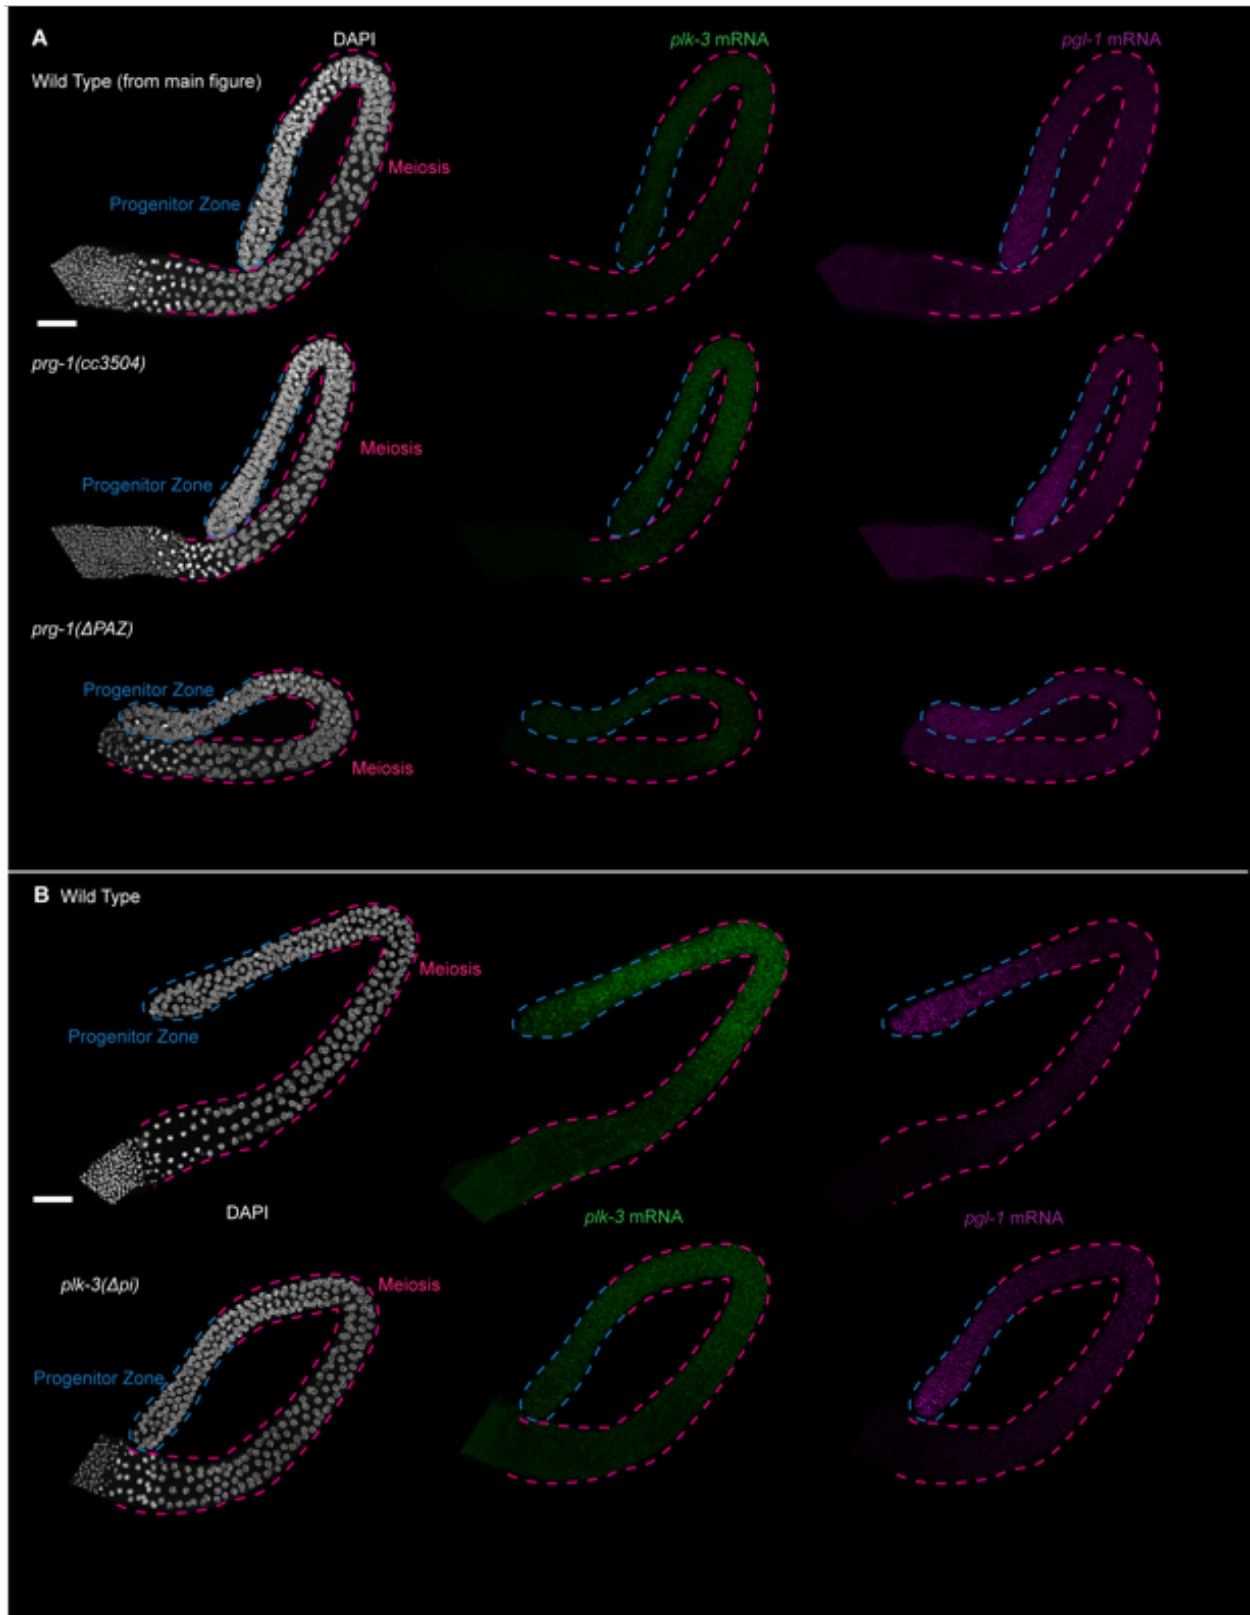

**Supp. Fig. 6: HCR-FISH germlines (A)** HCR-FISH experiment for Wild Type (from main figure) compared to parallel experiments in *prg-1(null)* and *prg-1(ΔPAZ)*. The presence of *pgl-1* probe,



a known germline-expressed gene, was used as a positive control. **(B)** HCR-FISH experiment conducted for Wild Type and *plk-3(Δpi)* germlines using the same probes as **(A)**. Scale bars are 50 μm to their respective germlines.

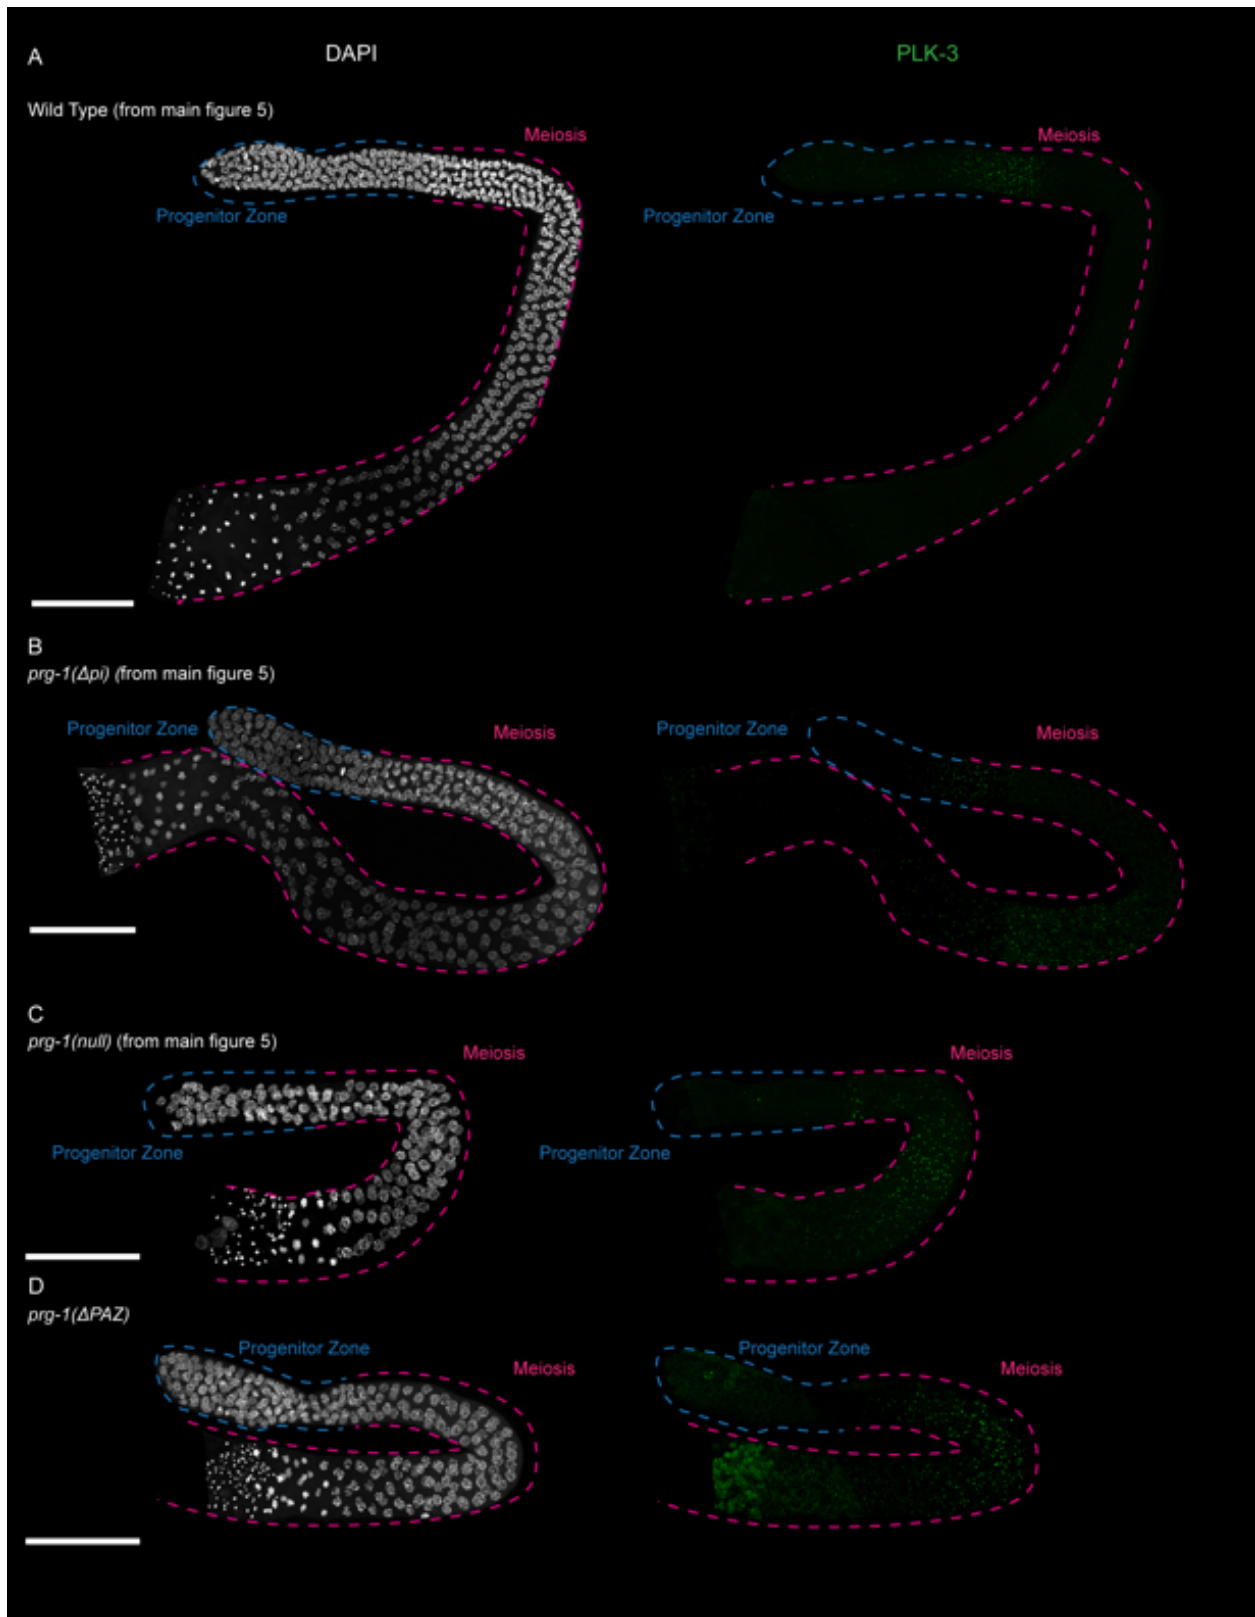

**Supp. Fig. 7: PLK-3::GFP germlines (A-D)** Representative DAPI-stained (white) germlines of PLK-3::GFP expression (green) from main figure 5 alongside data for *prg-1*( $\Delta$ PAZ). Scale bars are 50  $\mu$ m to their respective germlines.

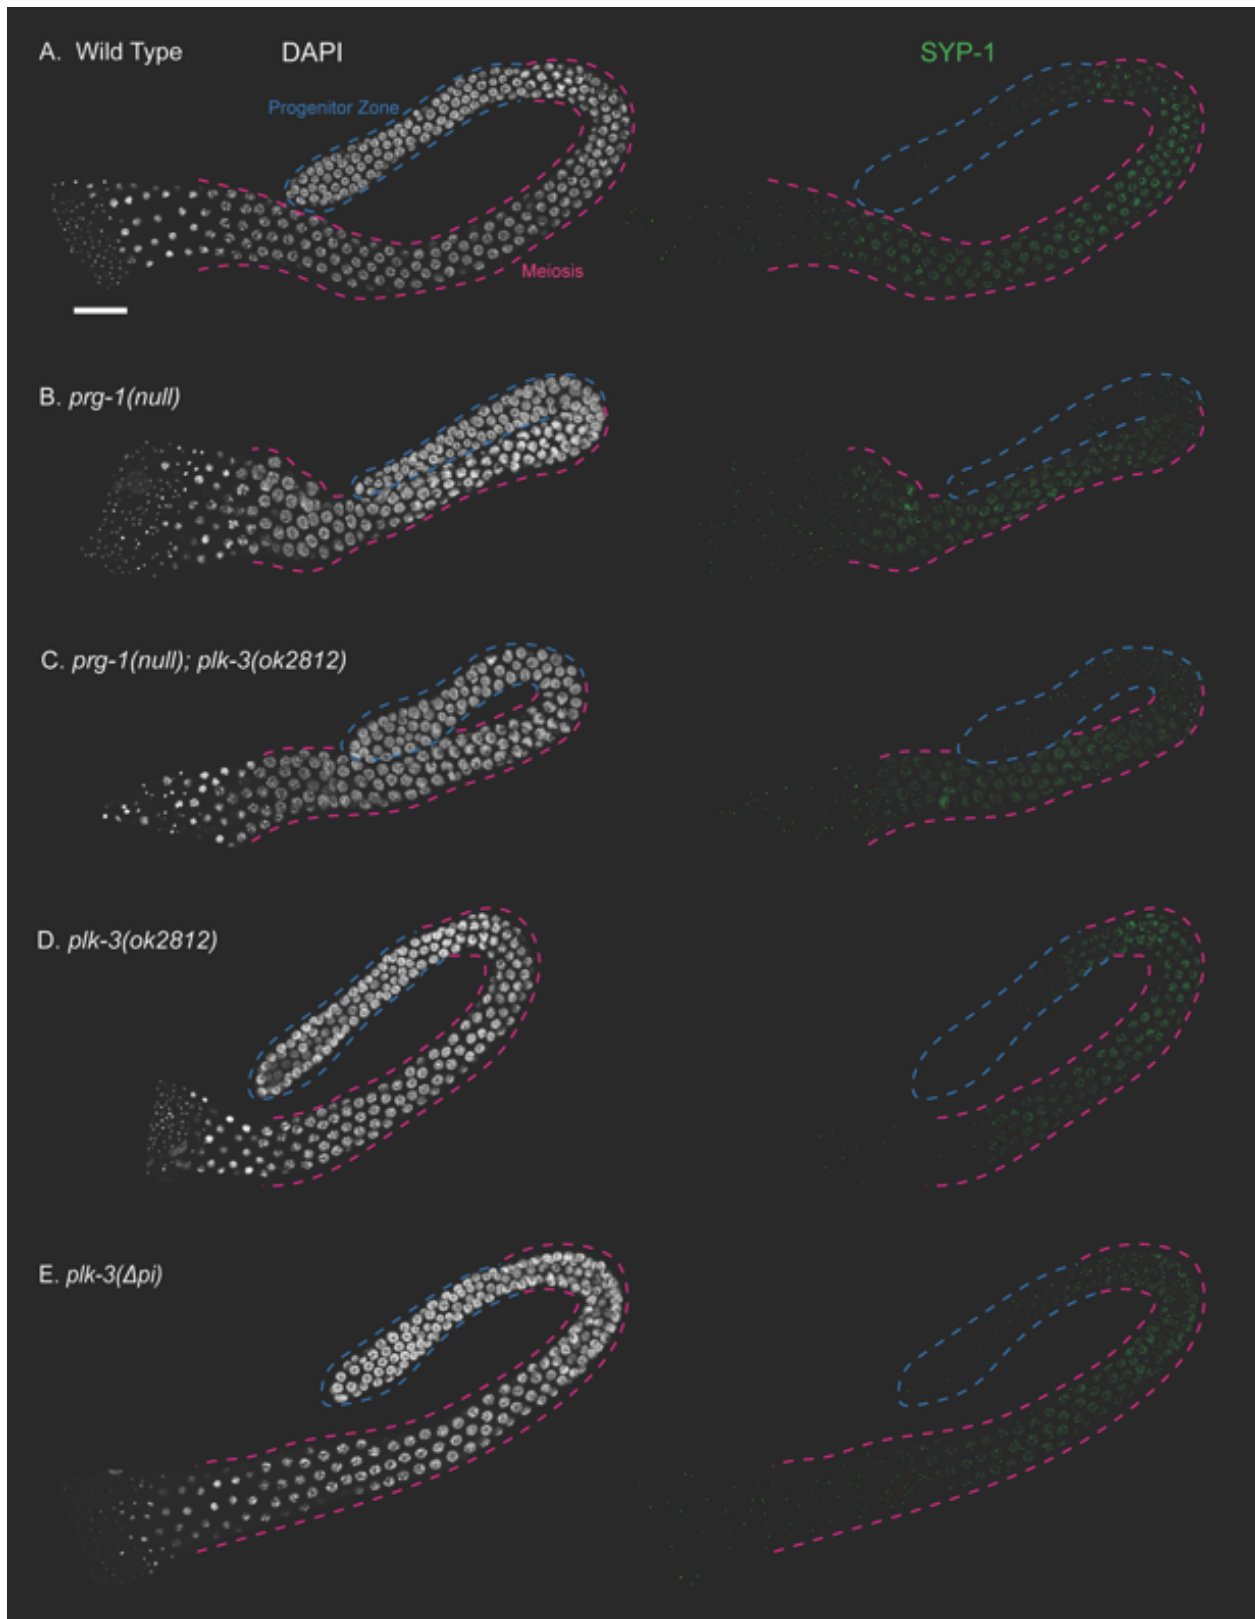

**Supp. Fig. 8: Representative DAPI and SYP-1 staining for germlines analyzed in main figure 6 (A-E)** Representative DAPI (white) and SYP-1 (green) staining for each genotype of germlines analyzed for meiotic progression defects. Scale bars: 25  $\mu\text{m}$ .

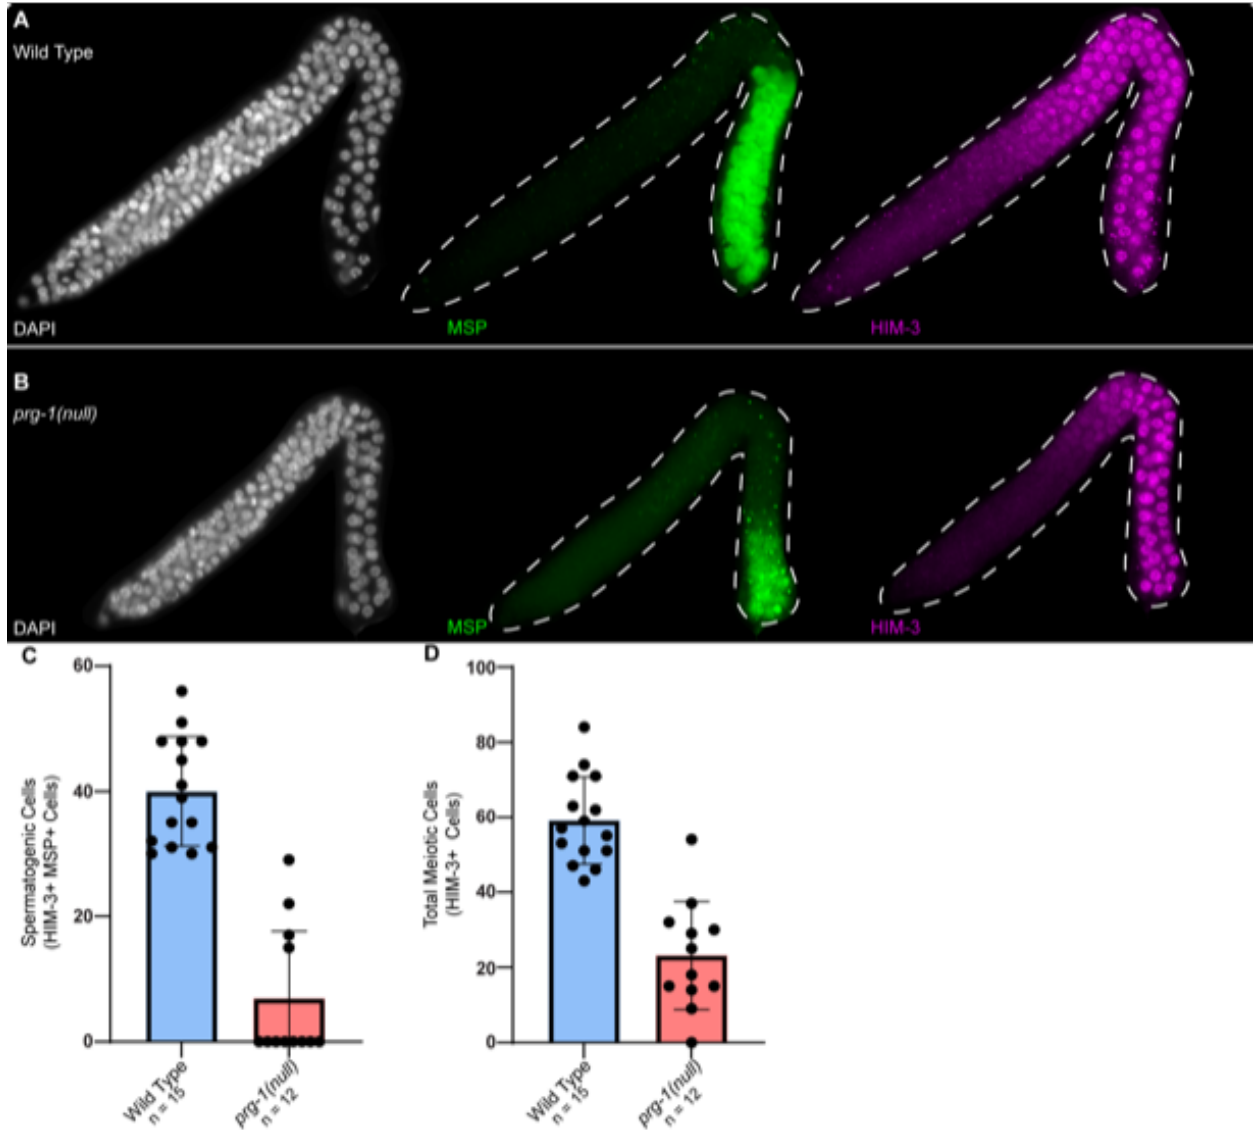

**Supp. Fig. 9: Delay of germline development in larval hermaphrodite germlines. (A-B)** Representative germlines from mid-L4 stage germlines hermaphrodites stained for DAPI (white), Major Sperm Protein (MSP) (green), and HIM-3 (magenta). **(C)** Quantification of spermatogenic cells (HIM-3+ MSP+) from mid-L4 germlines. **(D)** Quantification of total meiotic cells (HIM-3+) from mid-L4 germlines.

**Table S1. Analysis of small RNAs mapping to annotated piRNAs from Wild Type and *prg-1* mutant males (excel file).** Table of analysis comparing total piRNA counts between Wild Type and *prg-1* mutant samples in males.

**Table S2. Analysis of small RNAs mapping to annotated piRNAs from Wild Type and *prg-1*( $\Delta$ PAZ) RNA IP samples (excel file).** Table of analysis comparing total piRNA counts from RNA IP experiments between Wild Type and *prg-1*( $\Delta$ PAZ) samples.

**Table S3. Analysis of small RNAs mapping to annotated piRNAs from Wild Type and *prg-1* mutant hermaphrodite samples (excel file).** Table of analysis comparing total piRNA counts between Wild Type and *prg-1* mutant samples in hermaphrodites.

**Table S4. Analysis of candidate genes with reduced 22G siRNAs (excel file).** Table of analysis of genes with significantly reduced 22G siRNAs in *prg-1*(*null*) relative to Wild Type.

**Table S5. HCR probes:** Molecular HCR FISH probes used to detect expression of *plk-3* and *pgl-1* mRNA.

|                               |                       |                                     |
|-------------------------------|-----------------------|-------------------------------------|
| HCR FISH Probes: <i>pgl-1</i> | Molecular Instruments | Ordered Using Accession # ZK381.4a  |
| HCR FISH Probes: <i>plk-3</i> | Molecular Instruments | Ordered Using Accession # NM_068795 |



**Table S6. CRISPR-related oligonucleotides:** Oligonucleotides used in the generation and detection of CRISPR-edited alleles.

| Oligo type           | Name                  | Purpose         | Sequence                                                                                 |
|----------------------|-----------------------|-----------------|------------------------------------------------------------------------------------------|
| crRNAs               | Dpy-10                | Cas9            | GCTACCATAGGCACCAGAG                                                                      |
|                      | prg-1 mCherry knockin | Cas9            | TGGCATCTGGAAGTGGTCGC                                                                     |
|                      | ΔPAZ 1                | Cas9            | AAAATGAATGAGATGTACGG                                                                     |
|                      | ΔPAZ 2                | Cas9            | CCAGTCGGGAAGCACAGTTC                                                                     |
|                      | Rnase 1               | Cas9            | TACCACGACTCGACATTGAA                                                                     |
|                      | Rnase 2               | Cas9            | TTCCTTTCAATGTCGAGTCG                                                                     |
|                      | COSA-1 GFP knockin    | Cas9            | aagtgtcaATGTCAAGTTCT                                                                     |
|                      | PLK-3                 | Cas9            | CATTTATGCGAGATATCTGG                                                                     |
|                      | PLK-3 ΔpiRNA          | Cas9            | TACGACTGAGATACTTCTTT                                                                     |
|                      |                       |                 |                                                                                          |
|                      |                       |                 |                                                                                          |
|                      | Primers               | prg-1_WG_FWD    | Genotyping                                                                               |
| prg-1_WG_RVS         |                       | Genotyping      | TGCTGTAGTCGCTTTGAGTCA                                                                    |
| ΔPAZgenoFP           |                       | Genotyping      | GGAACACGATCGTGCCAGA                                                                      |
| ΔPAZgenoRP           |                       | Genotyping      | CCCACTCTGCTTGTCTTCT                                                                      |
| DDHgenoFWD           |                       | Genotyping      | CCATTCACAACCAATGCGTG                                                                     |
| DDHgenoRVS           |                       | Genotyping      | GTAGAGGATCAAGCGGCTCG                                                                     |
| cosa1_wrmS11_geno_FP |                       | Genotyping      | AAACTTAGGCTCTGGTCTCGTG                                                                   |
| cosa1_wrmS11_geno_RP |                       | Genotyping      | GAACCTGATTGCTGCTGA                                                                       |
| plk-3_cterm_geno_fp  |                       | Genotyping      | CAACCAGGAGCATGTCGTCT                                                                     |
| GFP112R              |                       | Genotyping      | CACCTTCACCCTTCCACTG                                                                      |
| plk-3_cterm_geno_rp  |                       | Genotyping      | TGCGAAAAGGTTGCAAGGTT                                                                     |
| JHS 59               |                       | Genotyping      | TCTTgtgagtgaagtgtatccttt                                                                 |
| JHS 60               |                       | Genotyping      | TTGGGCATATTCGATACGACTG                                                                   |
| JHS 61               |                       | Genotyping      | AGTATCTGTCCCGTATCGAGTAC                                                                  |
|                      |                       |                 |                                                                                          |
| ssODN                | ΔPAZ ssODN            | Repair Template | CCACAACGC GTTCAAGAGAAAATGAATGAGATGTACCTGTGCTTCCC GACTGGGCTAACGGATGAGATGCG                |
|                      | RNase ssODN           | Repair Template | AAAACACAATGATCGTCGGCTACGCTCTGTACCACGATCaCaTTaAAAGGAAAAACTGTCGGTGCTTGC GT                 |
|                      | ΔpiRNA ssODN          | Repair Template | CGCAAACATATTGACAACAGCTGTCCAAAGAGTATCTGTCCGATATCGAGTACGCACAGGCCAAAATTAATTGCTTCGTCTACA AAC |
|                      |                       |                 |                                                                                          |

**Table S7. Strains used in this study (excel file):** List of *C. elegans* strains generated and used in this study.

**Data S1. Small RNA read mapping of Wild Type and *prg-1* mutant male samples to annotated piRNAs (excel file).** Table of small RNA reads from wild type and *prg-1* mutant male samples mapped to the *C. elegans* genome and annotated piRNAs for downstream analysis.

**Data S2. Small RNA read mapping from Wild Type and *prg-1*( $\Delta$ PAZ) RNA IP samples to annotated piRNAs (excel file).** Table of small RNA reads from wild type *prg-1*( $\Delta$ PAZ) RNA IP samples mapped to the *C. elegans* genome and annotated piRNAs for downstream analysis.

**Data S3. Small RNA read mapping of Wild Type and *prg-1* mutant hermaphrodite samples to annotated piRNAs (excel file).** Table of small RNA reads from Wild Type and *prg-1* mutant samples mapped to the *C. elegans* genome and annotated piRNAs for downstream analysis.

**Data S4. Small RNA read mapping of Wild Type and *prg-1*(null) male samples to annotated cDNAs (excel file).** Table of small RNA reads from Wild Type and *prg-1* mutant male samples mapped to the *C. elegans* genome and cDNAs to identify 22G siRNA targets in downstream analysis.
